# Supplementary material
Source: PubMed Central journal article supplement (PMC4695625)

**A**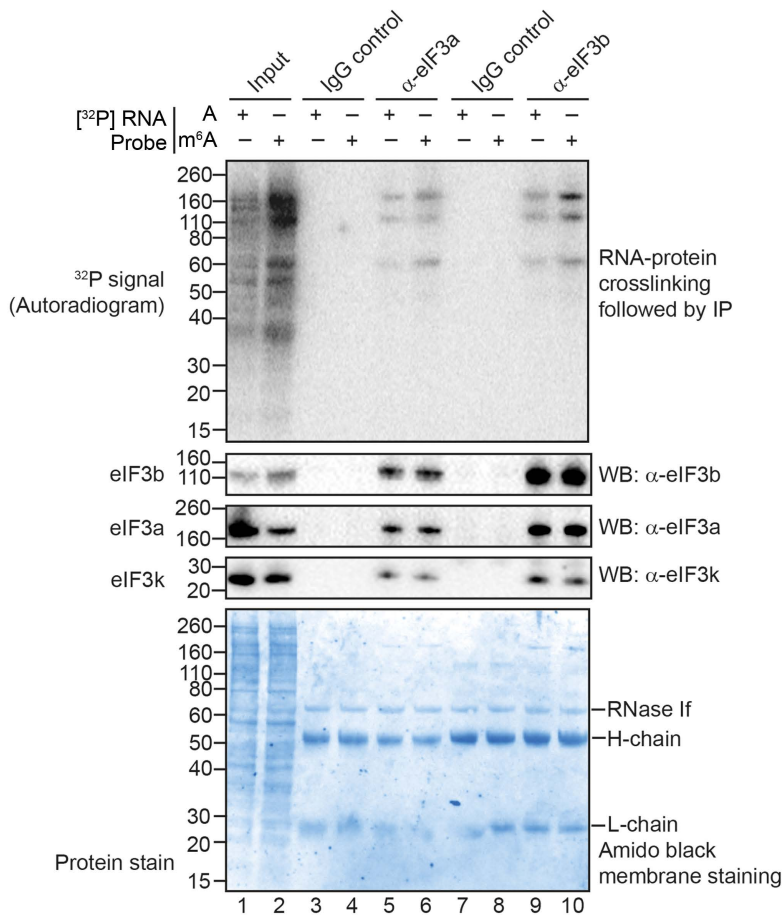**B**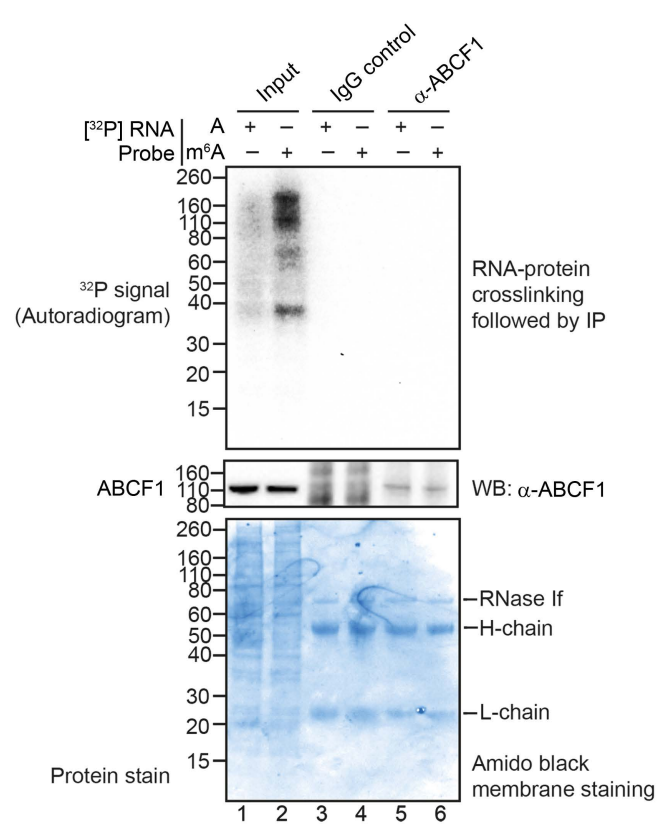**C**

| Accession   | Description                                          | MW [kDa] | # Peptides |
|-------------|------------------------------------------------------|----------|------------|
| EIF3D_HUMAN | Eukaryotic translation initiation factor 3 subunit D | 63.9     | 75         |
| EIF3I_HUMAN | Eukaryotic translation initiation factor 3 subunit I | 36.5     | 42         |
| EIF3M_HUMAN | Eukaryotic translation initiation factor 3 subunit M | 42.5     | 28         |
| EIF3E_HUMAN | Eukaryotic translation initiation factor 3 subunit E | 52.2     | 54         |
| EIF3H_HUMAN | Eukaryotic translation initiation factor 3 subunit H | 39.9     | 36         |
| EIF3K_HUMAN | Eukaryotic translation initiation factor 3 subunit K | 25.0     | 23         |
| EIF3G_HUMAN | Eukaryotic translation initiation factor 3 subunit G | 35.6     | 31         |
| EIF3L_HUMAN | Eukaryotic translation initiation factor 3 subunit L | 66.7     | 37         |
| EIF3F_HUMAN | Eukaryotic translation initiation factor 3 subunit F | 37.5     | 22         |
| EIF3C_HUMAN | Eukaryotic translation initiation factor 3 subunit C | 105.3    | 13         |
| IF4A2_HUMAN | Eukaryotic initiation factor 4A-II                   | 46.4     | 6          |
| EIF3B_HUMAN | Eukaryotic translation initiation factor 3 subunit B | 92.4     | 4          |
| ELP3_HUMAN  | Elongator complex protein 3                          | 62.2     | 2          |
| ATLA2_HUMAN | Atlastin-2                                           | 66.2     | 2          |
| IF4G1_HUMAN | Eukaryotic translation initiation factor 4 gamma 1   | 175.4    | 1          |

**D**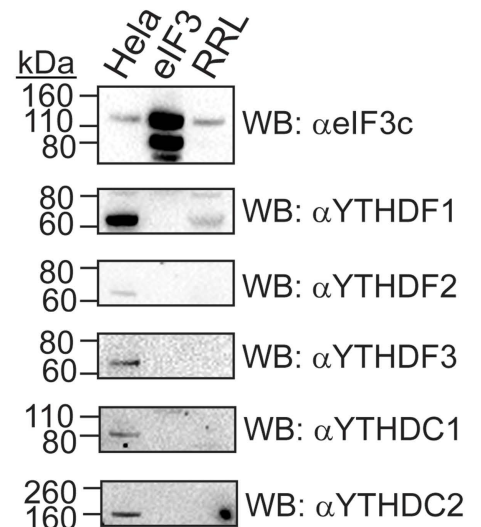

Supplement: NIHMS729590-supplement-3.pdf [file NIHMS729590-supplement-3.pdf]
