# Supplementary material
Source: PubMed Central journal article supplement (PMC4695625)

**A**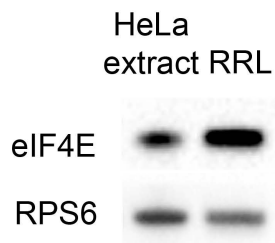**B**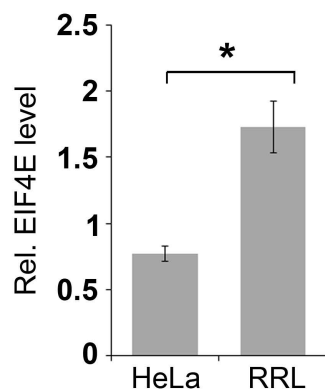**D**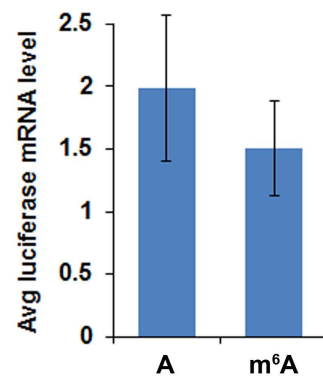**C**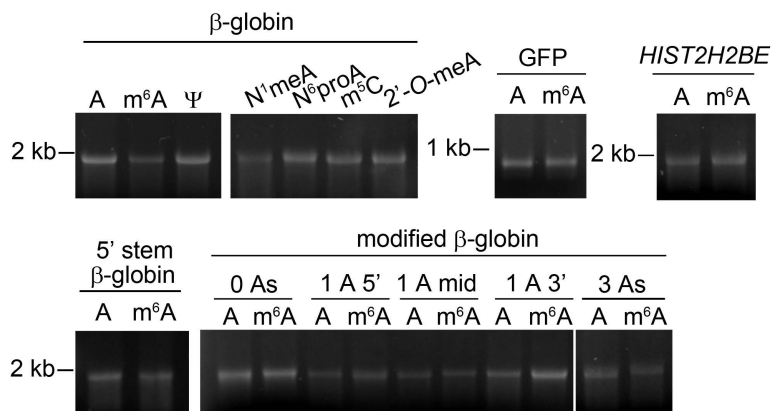**E**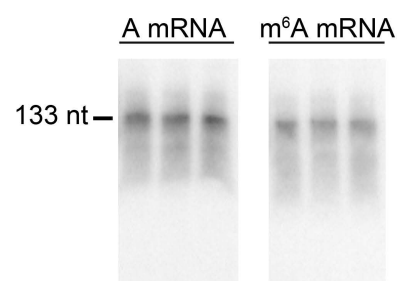**F**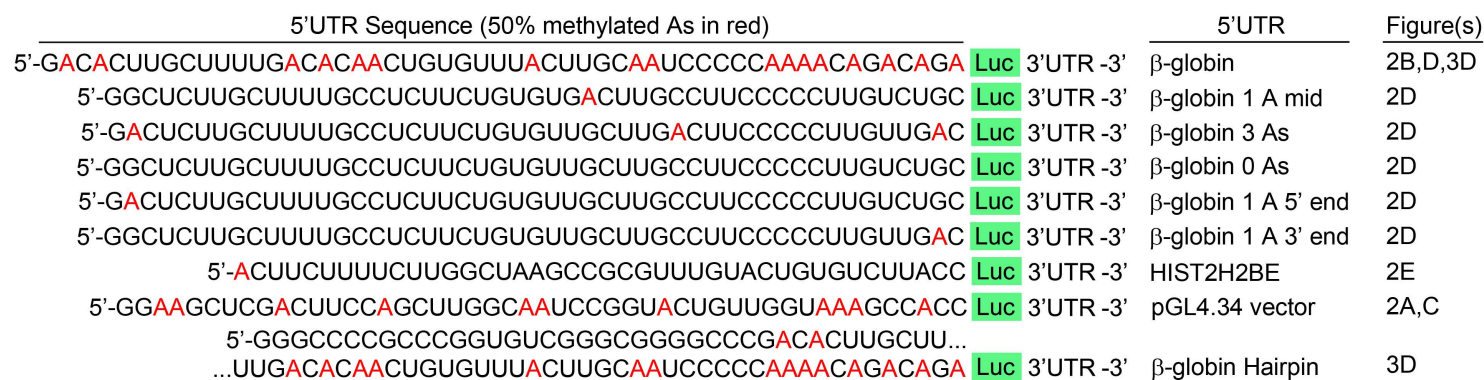**G**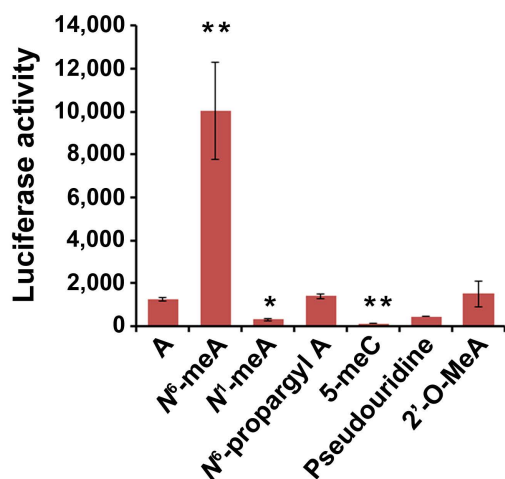**H**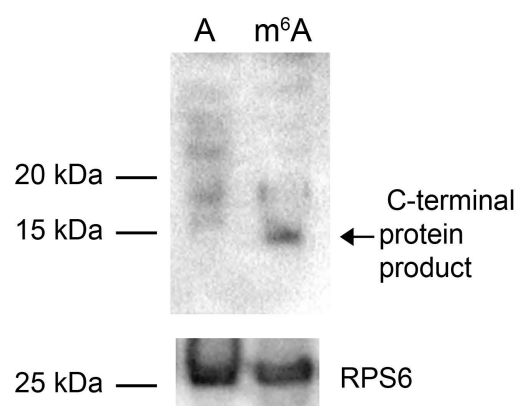

Supplement: NIHMS729590-supplement-1.pdf [file NIHMS729590-supplement-1.pdf]

**A**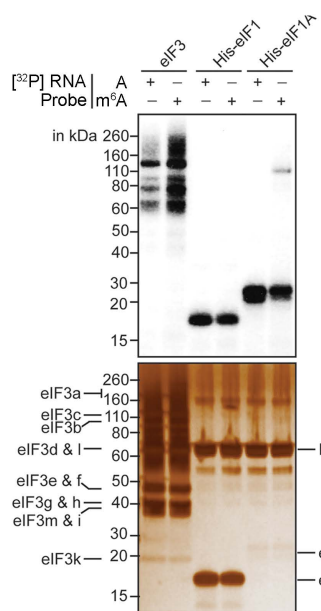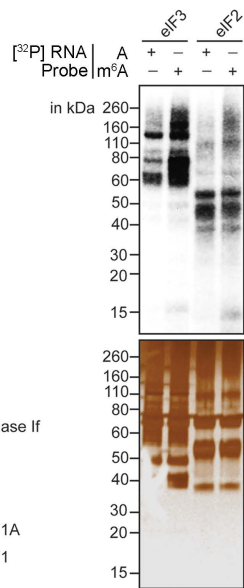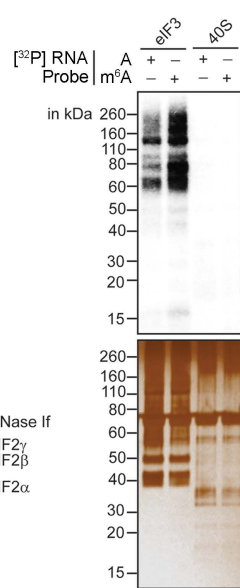**B**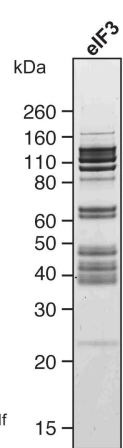**C**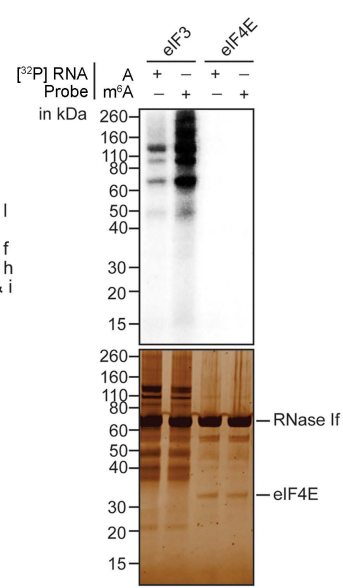**D**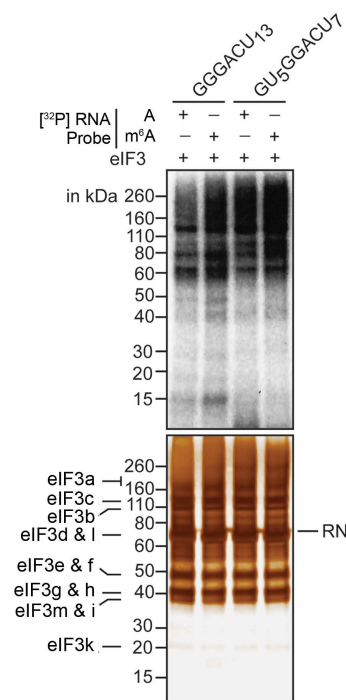**E**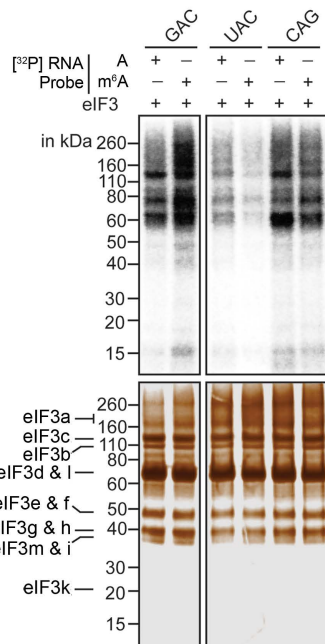**F**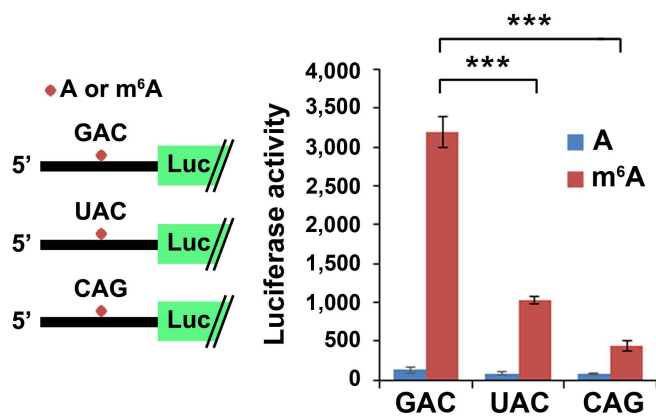

Supplement: NIHMS729590-supplement-2.pdf [file NIHMS729590-supplement-2.pdf]

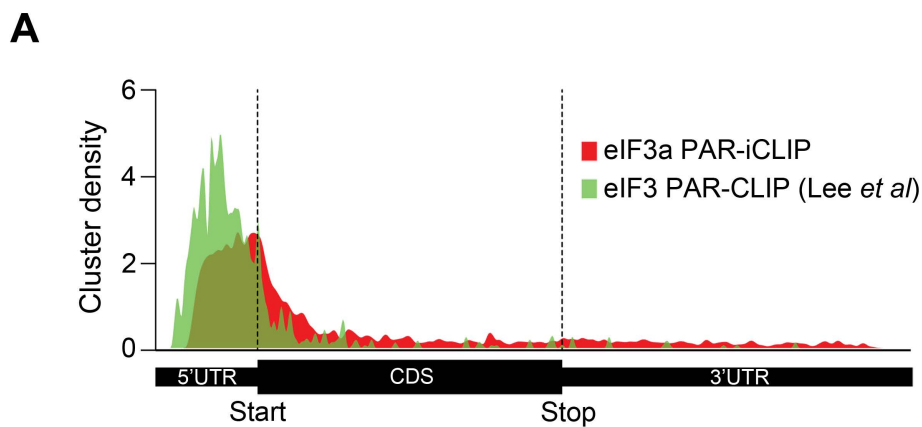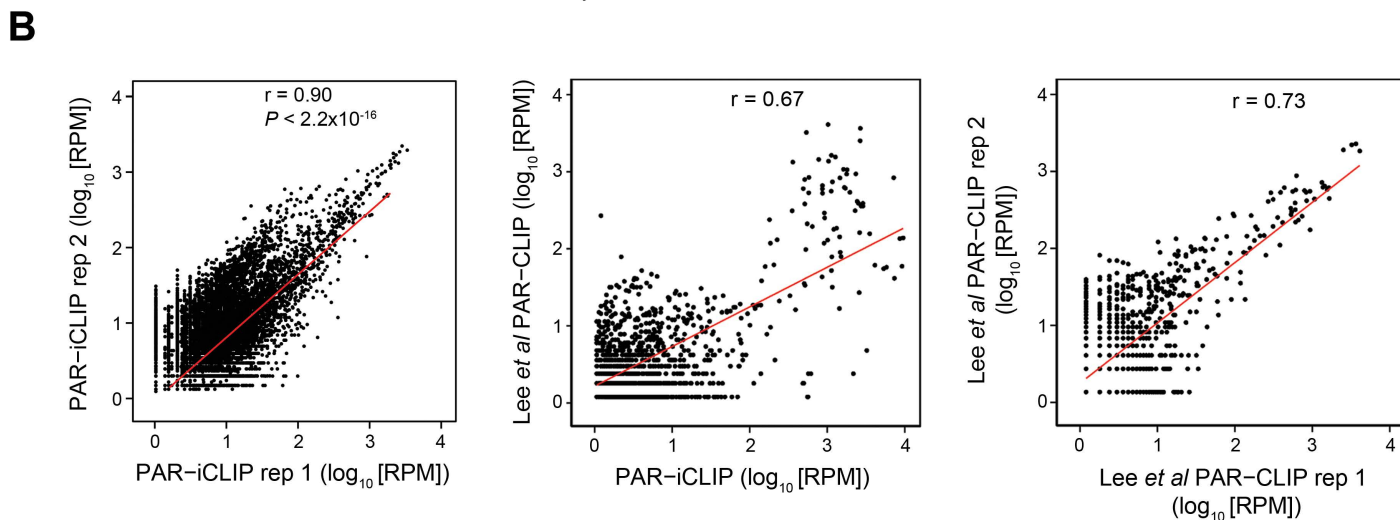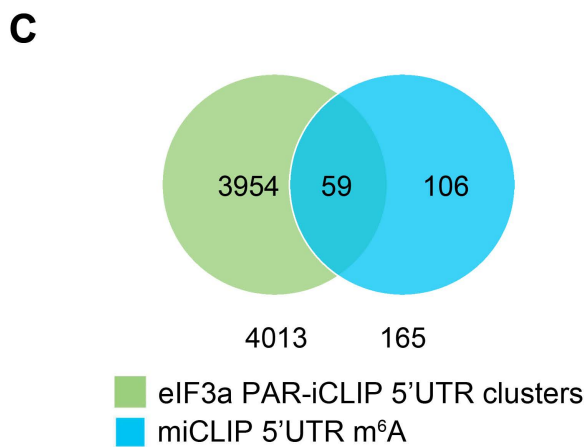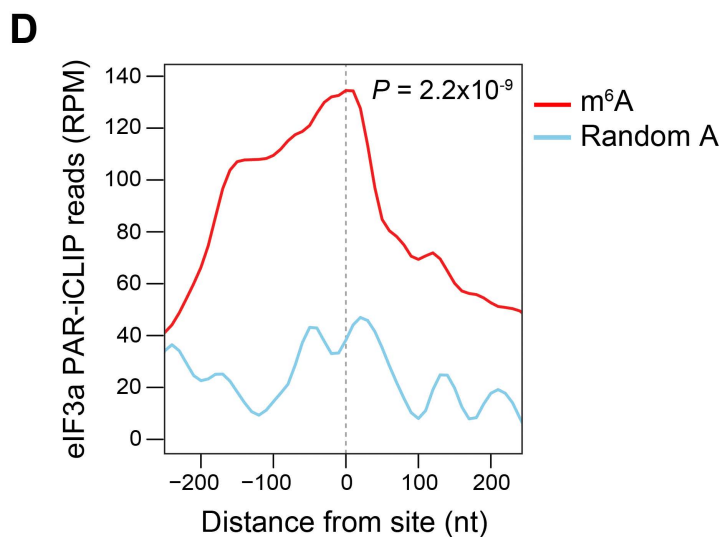

**E**

| Window size | % overlap | % overlap expected by chance | p-value    |
|-------------|-----------|------------------------------|------------|
| 25 nt       | 35%       | 25%                          | $p < 0.01$ |
| 20 nt       | 31.4%     | 21%                          | $p < 0.01$ |
| 10 nt       | 29.5%     | 19.5%                        | $p < 0.01$ |

Supplement: NIHMS729590-supplement-4.pdf [file NIHMS729590-supplement-4.pdf]

**A**

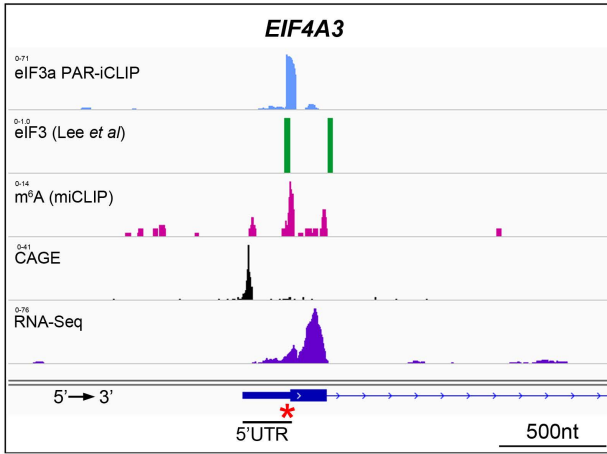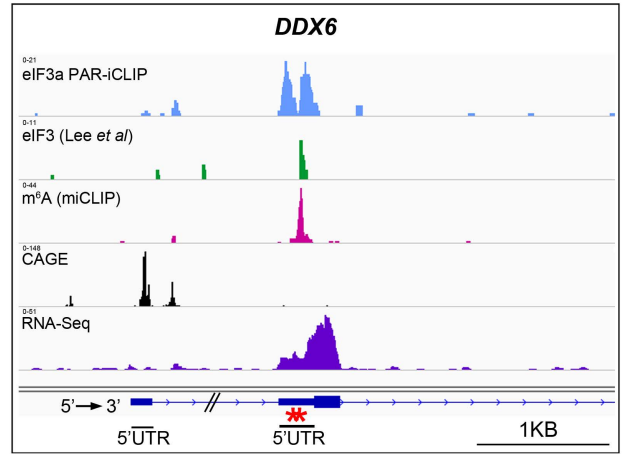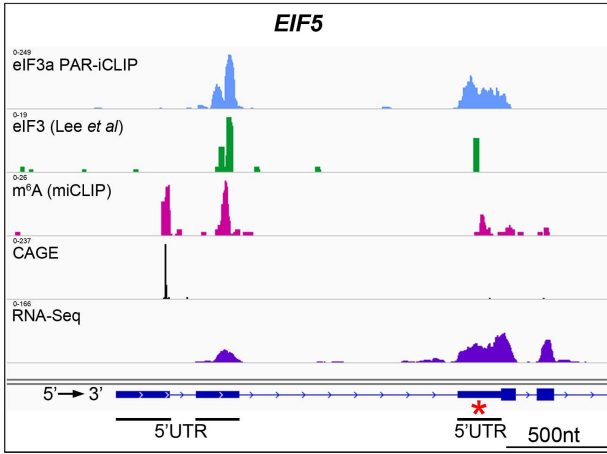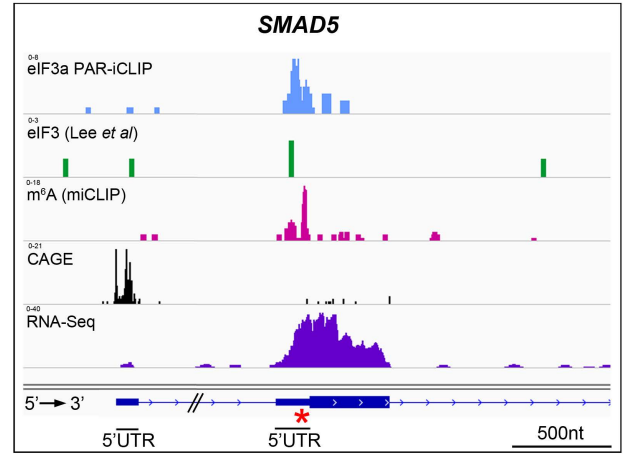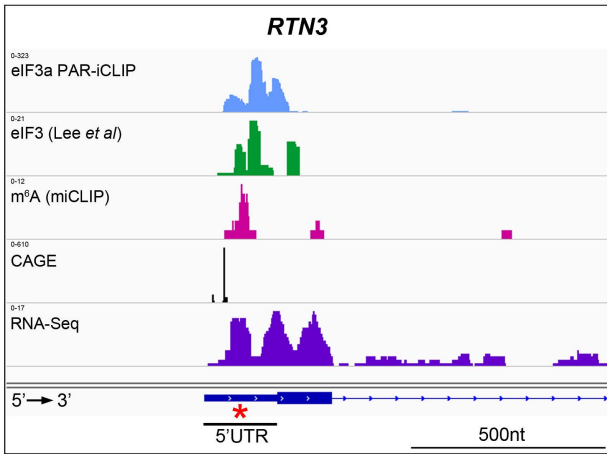

**B**

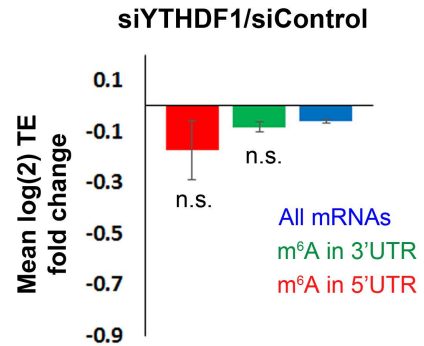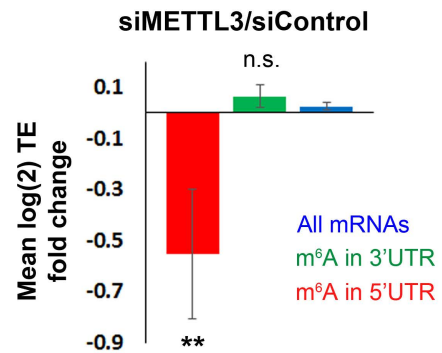

Supplement: NIHMS729590-supplement-5.pdf [file NIHMS729590-supplement-5.pdf]

**A**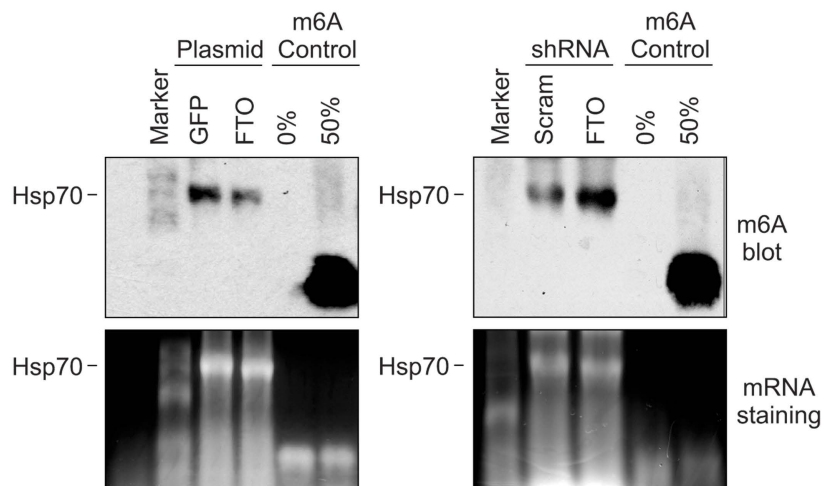**B**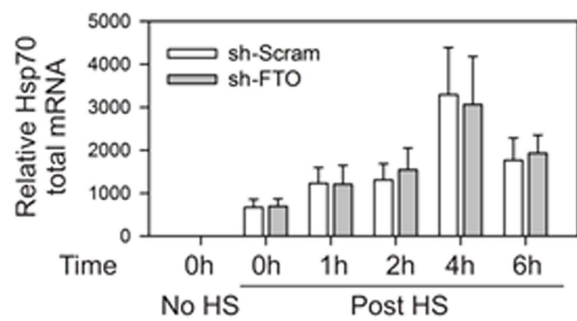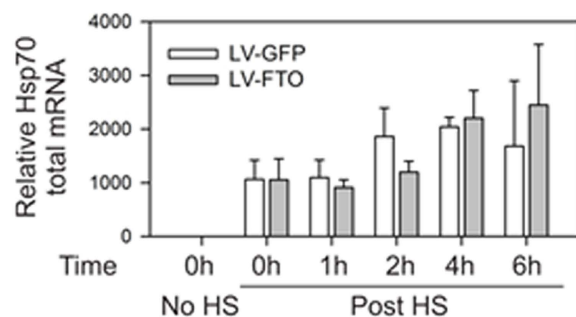**C**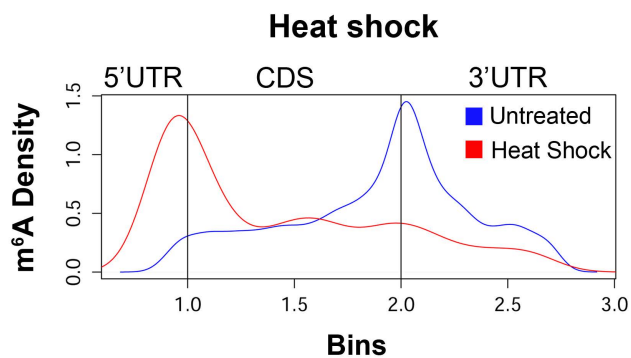**D**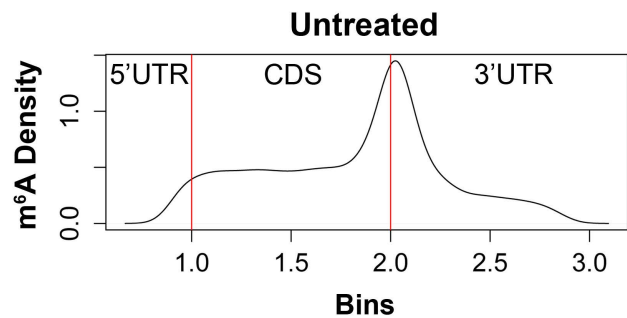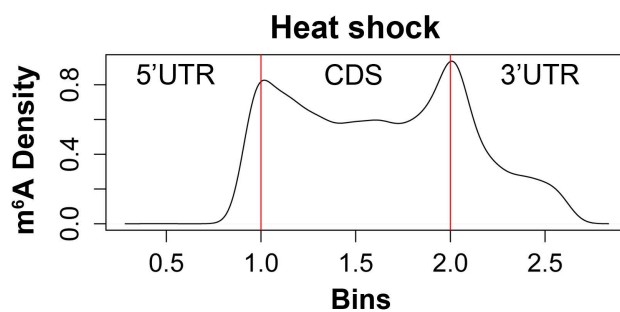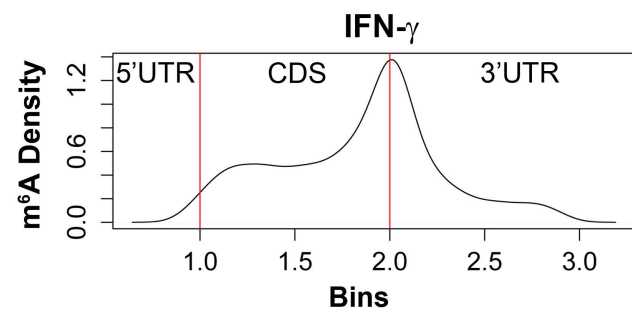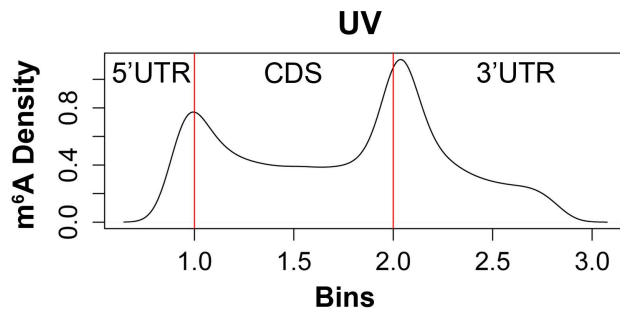

Supplement: NIHMS729590-supplement-6.pdf [file NIHMS729590-supplement-6.pdf]
